# Supplementary material
Source: PubMed Central journal article supplement (PMC514140)
Supplement: plntphys_135_2_1059__1.pdf [file plntphys_135_2_1059__1.pdf]

### **Supplemental Figure 3 Structural alignment of the TIP family with AQP1 and GlpF**

The amino acid sequences of the ten members of the Arabidopsis TIP family were aligned based on sequence and structural similarity with bovine AQP1 and *E. coli* GlpF by using the Multiple Alignment program of the MOE software as described in the Materials and Methods. The sequences are numbered as follows: **1** AQP1, **2** GlpF, **3** *Arabidopsis thaliana* (At)TIP1;1, **4** AtTIP1;2, **5** AtTIP1;3, **6** AtTIP2;1 **7** AtTIP2;2, **8** AtTIP2;3, **9** AtTIP3;1, **10** AtTIP3;2, **11** AtTIP4;1, **12** AtTIP5;1. Also shown are the structurally aligned homology models of **13** AtTIP1;1, **14** AtTIP2;1, **15** AtTIP3;1 and **16** AtTIP5;1. The red bars above the sequences denote the positions of transmembrane and NPA  $\alpha$ -helices (as outlined in Fig. 1 in the manuscript text) based on experimental structures (AQP1 and GlpF) and the TIP homology models. The blue and green bars above sequences represent regions of loops that constitute turns. The aligned ar/R residues are highlighted in vertical blue boxes.

|    | 5     | 10       | 15   | 20   | 25     | 30     | 35                | 40                | 45                | 50                  | 55                  | 60                | 65                       | 70          | 75            | 80             |           |
|----|-------|----------|------|------|--------|--------|-------------------|-------------------|-------------------|---------------------|---------------------|-------------------|--------------------------|-------------|---------------|----------------|-----------|
| 1  | ..... | MAS      | .... | EFKK | ..     | K      | ..                | LFWR              | AVVAEFLAM         | ILFIFISIGS          | ALG                 | ...               | FHYPIKSNQTTGAVQDNVKVSLAF | GG          |               |                |           |
| 2  | ..... |          |      |      |        |        |                   | TLKGQC            | IAEFLGTGLL        | IFFGVGCVAA          | ...                 | LKVA              | .....                    | GASFGQWE    | ISVI          | WG             |           |
| 3  | MP    | IRN      | ..   | IA   |        | GRPD   | ....              | EATR              | ..                | P                   | ..                  | DALKAALAEFISTLIFV | VAGSGSGMA                | ...         | FNKLTENGAT    | TPSGLVAAVAHA   |           |
| 4  | MP    | TRN      | ..   | IA   |        | IGGVQE | ....              | EYH               | ..                | P                   | ..                  | NALRAALAEFISTLIFV | VAGSGSGIA                | ...         | FNKITDNGAT    | TPSGLVAAALHA   |           |
| 5  | MP    | INR      | ..   | IA   |        | GTPG   | ....              | EASR              | ..                | P                   | ..                  | DAIRAAFAEFFSMVIFV | FAGQSGMA                 | ...         | YGKLTGDGPA    | TPAGLVAAASLSHA |           |
| 6  | MAG   | VAV      | .... | F    | GSFD   | ....   | DSFS              | ..                | L                 | ..                  | ASLRAYLAEFISTLLFV   | FAGVGS            | IA                       | ...         | YAKLTSDAALDTP | GLVAIAVCHG     |           |
| 7  | MVK   | IE       | .... | I    | GSVG   | ....   | DSFS              | ..                | V                 | ..                  | ASLKAYLSEFIATLLFV   | FAGVGSALA         | ...                      | FAKLTSDAALD | PAGLVAVVAHA   |                |           |
| 8  | MVK   | IE       | .... | V    | GSVG   | ....   | DSFS              | ..                | V                 | ..                  | SSLKAYLSEFIATLLFV   | FAGVGS            | AVA                      | ...         | FAKLTSDGALD   | PAGLVAAIAHA    |           |
| 9  | MAT   | SARRAYGF | GRAD | .... | EATH   | ..     | P                 | ..                | DSIRATLAEFLSTFVFV | FAAEGS              | ILSLDKLYWEHAAHAGTNT | PGGL              | IL                       | LVAL        | HAHA          |                |           |
| 10 | MAT   | SARRAYGF | GRAD | .... | EATH   | ..     | P                 | ..                | DSIRATLAEFLSTFVFV | FAGEGS              | ILALDKLYWDTAAHTGTNT | PGGLV             | L                        | LVAL        | HAHA          |                |           |
| 11 | MKK   | IE       | .... | L    | GHHS   | ....   | EAAK              | ..                | P                 | ..                  | DCIKALIVEFITFLFV    | FAGVGS            | SAMA                     | ...         | TDSLVGNTLV    | GLFVAVVAHA     |           |
| 12 | MRR   | MI       | ..   | PTS  | FSSKFQ | ....   | GVLS              | ..                | M                 | ..                  | NALRCYVSEFISTFFFV   | LA                | AVG                      | SVMS        | ...           | SRKLMAGDVSGPF  | GVLIPIANA |
| 13 | ..... | RPD      | .... | EATR | ..     | P      | ..                | DALKAALAEFISTLIFV | VAGSGSGMA         | ...                 | FNKLTENGATTPSGLV    | ..                | AAVA                     | HAHA        |               |                |           |
| 14 | ..... | MAG      | VAV  | GSFD | DSFS   | ....   | ASLRAYLAEFISTLLFV | FAGVGS            | IA                | ...                 | YAKLTSDAALD         | TPGLVA            | IAVCHG                   |             |               |                |           |
| 15 | ..... | RAD      | .... | EATH | ..     | P      | ..                | DSIRATLAEFLSTFVFV | FAAEGS            | ILSLDKLYWEHAAHAGTNT | PGGL                | IL                | LVAL                     | HAHA        |               |                |           |
| 16 | ..... | FSS      | .... | KFQG | ..     | VLSM   | NALRCYVSEFISTFFFV | LA                | AVG               | SVMS                | ...                 | SR                | KLMAGDVSGPF              | GVLIPIANA   |               |                |           |

*Helix1*

*Helix2*

|    | 90   | 95        | 100     | 105        | 110        | 115      | 120         | 125     | 130     | 135          | 140      | 145      | 150   | 155   | 160   | 165 |
|----|------|-----------|---------|------------|------------|----------|-------------|---------|---------|--------------|----------|----------|-------|-------|-------|-----|
| 1  | LSI  | ATLAQSVG  | HI      | SGAHLNPAVT | LGLLL      | SCQISVLR | AIMYII      | AQCVGAI | VATA    | ILSGITSS     | LP       | .....    | DNS   |       |       |     |
| 2  | LGV  | AMAIY     | LTAGV   | SGAHLNPAVT | IALWL      | FACFD    | KRQV        | IPFIV   | SQVAGAF | CAAALVYGLYYN | LFDFEQ   | THH      | IVR   | GSVES | VDLAG |     |
| 3  | FGLF | VAVSVGA   | NI      | SGGHVNP    | AVT        | FGAF     | IGGNIT      | LLRGL   | LYWI    | AQLLGS       | VVACL    | ILKFAT   | GG    | ..... | LA    |     |
| 4  | FGLF | VAVSVGA   | NI      | SGGHVNP    | AVT        | FGVLL    | GGNIT       | LLRGL   | LYWI    | AQLLGS       | VAA      | CFLLSFAT | GG    | ..... | EP    |     |
| 5  | FALF | VAVSVGA   | NV      | SGGHVNP    | AVT        | FGAF     | IGGNIT      | LLRAI   | LYWI    | AQLLGA       | VVACL    | LLKVST   | GG    | ..... | ME    |     |
| 6  | FALF | VAVAIGA   | NI      | SGGHVNP    | AVT        | FLAVGGQ  | ITVIT       | GVFYWI  | AQLLGS  | TAA          | CFLLYVT  | GG       | ..... | LA    |       |     |
| 7  | FALF | VGV       | IAA     | NI         | SGGHLNPAVT | LGLAV    | GGNITVIT    | GFFYWI  | AQCLGS  | IVAC         | LLLVFTNG | .....    | ES    |       |       |     |
| 8  | FALF | VGV       | IAA     | NI         | SGGHLNPAVT | LGLA     | IGGNITLIT   | GFFYWI  | AQCLGS  | IVAC         | LLLVFTNG | .....    | KS    |       |       |     |
| 9  | FAL  | FAAVSAA   | NI      | NVSGGHVNP  | AVT        | FGALV    | GGRVTAIRAI  | YWI     | AQLLGA  | ILAC         | LLRLTTNG | .....    | MR    |       |       |     |
| 10 | LAL  | FAAVSAA   | NI      | NVSGGHVNP  | AVT        | FAAL     | IGGRISVIRAI | YVWAQ   | LIGAI   | LAC          | LLRLATNG | .....    | LR    |       |       |     |
| 11 | FV   | VAVMI     | SAG     | HI         | SGGHLNPAVT | LGLLL    | GGHISV      | FRAFL   | YWI     | DQLLASSA     | CFLLSYLT | GG       | ..... | MG    |       |     |
| 12 | LAL  | SSSVY     | ISW     | NVSGGHVNP  | AVT        | FAMAVA   | GRISVPTAMF  | YWTSQM  | IASVMA  | CLV          | LKVTVME  | .....    | QH    |       |       |     |
| 13 | FGLF | VAVSVGANI | SGGHVNP | AVT        | FGAF       | IGGNIT   | LLRGL       | LYWI    | AQLLGS  | VVACL        | ILKFAT   | GG       | LA    | ..... | VPA   |     |
| 14 | FALF | VAVAIGA   | NI      | SGGHVNP    | AVT        | FLAVGGQ  | ITVIT       | GVFYWI  | AQLLGS  | TAA          | CFLLYVT  | GG       | ..... | LA    |       |     |
| 15 | FAL  | FAAVSAA   | NI      | NVSGGHVNP  | AVT        | FGALV    | GGRVTAIRAI  | YWI     | AQLLGA  | ILAC         | LLRLTTNG | .....    | MRP   |       |       |     |
| 16 | LAL  | SSSVY     | ISW     | NVSGGHVNP  | AVT        | FAMAVA   | GRISVPTAMF  | YWTSQM  | IASVMA  | CLV          | LKVTVME  | .....    | EQH   |       |       |     |

*Helix2*

*NPA Loop B*

*Helix3*

|    | 175 | 180 | 185 | 190 | 195 | 200 | 205 | 210 | 215 | 220 | 225 | 230 | 235 | 240 | 245 | 250 |   |   |   |   |   |   |   |   |   |   |   |   |   |   |   |   |   |   |   |   |   |   |   |   |   |   |   |   |   |   |   |   |   |   |   |   |   |   |   |   |   |   |   |   |   |   |   |   |   |   |   |   |   |   |   |   |   |   |   |   |   |   |   |   |   |   |   |   |   |
|----|-----|-----|-----|-----|-----|-----|-----|-----|-----|-----|-----|-----|-----|-----|-----|-----|---|---|---|---|---|---|---|---|---|---|---|---|---|---|---|---|---|---|---|---|---|---|---|---|---|---|---|---|---|---|---|---|---|---|---|---|---|---|---|---|---|---|---|---|---|---|---|---|---|---|---|---|---|---|---|---|---|---|---|---|---|---|---|---|---|---|---|---|---|
| 1  | L   | G   | L   | N   | A   | L   | A   | P   | G   | V   | N   | S   | G   | Q   | G   | L   | G | · | I | E | I | G | T | L | Q | L | V | L | C | V | L | A | T | · | D | R | R | R | R | D | L | G | G | · | S | G | P | L | A | I | G | F | S | V | A | L | G | H | L | L | A | I | D | Y | T | G | C | G | I | N | P | A | R | S | F | G | S | S | V | I | T | H | · |   |   |
| 2  | T   | F   | S   | T   | Y   | P   | N   | P   | H   | I   | N   | F   | V   | Q   | A   | F   | A | · | V | E | M | V | I | T | A | I | M | G | L | I | L | A | L | T | · | D | D | G | N | G | V | P | R | G | P | L | A | P | L | L | I | G | L | L | I | A | V | I | G | A | S | M | G | P | L | T | G | F | A | M | N | P | A | R | D | F | G | P | K | V | F | A | W | L | · |
| 3  | V   | P   | A   | F   | G   | L   | S   | A   | G   | V   | G   | L   | N   | A   | F   | V   | · | F | E | I | V | M | T | F | G | L | V | Y | T | V | Y | A | T | A | I | D | P | K | N | G | S | L | G | T | · | I | A | P | I | A | I | G | F | I | V | G | A | N | I | L | A | G | G | A | F | S | G | A | S | M | N | P | A | V | A | F | G | P | A | V | V | S | W | · |   |
| 4  | I   | P   | A   | F   | G   | L   | S   | A   | G   | V   | G   | S   | L   | N   | A   | L   | V | · | F | E | I | V | M | T | F | G | L | V | Y | T | V | Y | A | T | A | V | D | P | K | N | G | S | L | G | T | · | I | A | P | I | A | I | G | F | I | V | G | A | N | I | L | A | G | G | A | F | S | G | A | S | M | N | P | A | V | A | F | G | P | A | V | V | S | W | · |
| 5  | T   | A   | A   | F   | S   | L   | S   | Y   | G   | V   | T   | P   | W   | N   | A   | V   | V | · | F | E | I | V | M | T | F | G | L | V | Y | T | V | Y | A | T | A | V | D | P | K | K | G | D | I | G | I | · | I | A | P | L | A | I | G | L | I | V | G | A | N | I | L | V | G | G | A | F | D | G | A | S | M | N | P | A | V | S | F | G | P | A | V | V | S | W | · |
| 6  | V   | P   | T   | H   | S   | V   | A   | A   | G   | L   | G   | S   | I   | E   | G   | V   | V | · | M | E | I | I | T | F | A | L | V | Y | T | V | Y | A | T | A | A | D | P | K | K | G | S | L | G | T | · | I | A | P | L | A | I | G | L | I | V | G | A | N | I | L | A | A | G | P | F | S | G | S | M | N | P | A | R | S | F | G | P | A | V | A | A | G | · |   |   |
| 7  | V   | P   | T   | H   | G   | V   | A   | A   | G   | L   | G   | A   | I   | E   | G   | V   | V | · | M | E | I | V | V | T | F | A | L | V | Y | T | V | Y | A | T | A | A | D | P | K | K | G | S | L | G | T | · | I | A | P | I | A | I | G | F | I | V | G | A | N | I | L | A | A | G | P | F | S | G | S | M | N | P | A | R | S | F | G | P | A | V | V | S | G | · |   |
| 8  | V   | P   | T   | H   | G   | V   | S   | A   | G   | L   | G   | A   | V   | E   | G   | V   | V | · | M | E | I | V | V | T | F | A | L | V | Y | T | V | Y | A | T | A | A | D | P | K | K | G | S | L | G | T | · | I | A | P | I | A | I | G | F | I | V | G | A | N | I | L | A | A | G | P | F | S | G | S | M | N | P | A | R | S | F | G | P | A | V | V | S | G | · |   |
| 9  | P   | V   | G   | F   | R   | L   | A   | S   | G   | V   | G   | A   | V   | N   | G   | L   | V | · | L | E | I | I | L | T | F | G | L | V | Y | V | Y | S | T | L | I | D | P | K | R | G | S | L | G | I | · | I | A | P | L | A | I | G | L | I | V | G | A | N | I | L | V | G | G | P | F | S | G | A | S | M | N | P | A | R | A | F | G | P | A | L | V | G | W | · |   |
| 10 | P   | V   | G   | F   | H   | V   | A   | S   | G   | V   | S   | E   | L   | H   | G   | L   | L | · | M | E | I | I | L | T | F | A | L | V | Y | V | Y | S | T | A | I | D | P | K | R | G | S | L | G | I | · | I | A | P | L | A | I | G | L | I | V | G | A | N | I | L | V | G | G | P | F | D | G | A | S | M | N | P | A | R | A | F | G | P | A | L | V | G | W | · |   |
| 11 | T   | P   | V   | H   | T   | L   | A   | S   | G   | V   | S   | Y   | T   | Q   | G   | I   | I | · | W | E | I | I | L | T | F | S | L | L | F | T | V | Y | A | T | I | V | D | P | K | K | G | S | L | D | G | · | F | G | P | L | L | T | G | F | V | V | G | A | N | I | L | A | G | G | A | F | S | G | A | S | M | N | P | A | R | S | F | G | P | A | L | V | S | G | · |
| 12 | V   | P   | I   | Y   | K   | I   | A   | G   | E   | M   | T   | G   | F   | G   | A   | S   | V | · | L | E | G | V | L | A | F | V | L | Y | T | V | F | · | T | A | S | D | P | R | R | G | L | P | L | A | · | V | G | P | I | F | I | G | F | V | A | G | A | N | V | L | A | A | G | P | F | S | G | S | M | N | P | A | C | A | F | G | S | A | M | V | Y | G | · |   |   |
| 13 | F   | G   | L   | S   | A   | G   | V   | ·   | ·   | ·   | G   | V   | L   | N   | A   | F   | V | · | F | E | I | V | M | T | F | G | L | V | Y | T | V | Y | A | T | A | I | D | P | K | N | G | S | L | G | T | · | I | A | P | I | A | I | G | F | I | V | G | A | N | I | L | A | G | G | A | F | S | G | A | S | M | N | P | A | V | A | F | G | P | A | V | V | S | W | · |
| 14 | V   | P   | T   | H   | S   | V   | A   | A   | G   | L   | G   | S   | T   | E   | G   | V   | V | · | M | E | I | I | T | F | A | L | V | Y | T | V | Y | A | T | A | A | D | P | K | K | G | S | L | G | T | · | I | A | P | L | A | I | G | L | I | V | G | A | N | I | L | A | A | G | P | F | S | G | S | M | N | P | A | R | S | F | G | P | A | V | A | A | G | · |   |   |
| 15 | V   | G   | F   | R   | L   | ·   | A   | S   | G   | V   | G   | A   | V   | N   | G   | L   | V | · | L | E | I | I | L | T | F | G | L | V | Y | V | Y | S | T | L | I | D | P | K | R | G | S | L | G | I | · | I | A | P | L | A | I | G | L | I | V | G | A | N | I | L | V | G | G | P | F | S | G | A | S | M | N | P | A | R | A | F | G | P | A | L | V | G | W | · |   |
| 16 | V   | P   | I   | Y   | K   | I   | A   | ·   | G   | E   | M   | T   | G   | F   | G   | A   | S | V | · | L | E | G | V | L | A | F | V | L | Y | T | V | F | T | A | S | · | D | P | R | R | G | L | P | L | A | · | V | G | P | I | F | I | G | F | V | A | G | A | N | V | L | A | A | G | P | F | S | G | S | M | N | P | A | C | A | F | G | S | A | M | V | Y | G | · |   |

*Helix4*

*Helix5*

*NPA Loop E*

|    | 260 | 265 | 270 | 275 | 280 | 285 | 290 | 295 | 300 | 305 | 310 | 315 | 320 |
|----|-----|-----|-----|-----|-----|-----|-----|-----|-----|-----|-----|-----|-----|
| 1  | ·   | ·   | ·   | ·   | ·   | ·   | ·   | ·   | ·   | ·   | ·   | ·   | ·   |
| 2  | A   | G   | W   | G   | N   | V   | A   | F   | T   | G   | G   | R   | D   |
| 3  | ·   | ·   | ·   | ·   | ·   | ·   | ·   | ·   | ·   | ·   | ·   | ·   | ·   |
| 4  | ·   | ·   | ·   | ·   | ·   | ·   | ·   | ·   | ·   | ·   | ·   | ·   | ·   |
| 5  | ·   | ·   | ·   | ·   | ·   | ·   | ·   | ·   | ·   | ·   | ·   | ·   | ·   |
| 6  | ·   | ·   | ·   | ·   | ·   | ·   | ·   | ·   | ·   | ·   | ·   | ·   | ·   |
| 7  | ·   | ·   | ·   | ·   | ·   | ·   | ·   | ·   | ·   | ·   | ·   | ·   | ·   |
| 8  | ·   | ·   | ·   | ·   | ·   | ·   | ·   | ·   | ·   | ·   | ·   | ·   | ·   |
| 9  | ·   | ·   | ·   | ·   | ·   | ·   | ·   | ·   | ·   | ·   | ·   | ·   | ·   |
| 10 | ·   | ·   | ·   | ·   | ·   | ·   | ·   | ·   | ·   | ·   | ·   | ·   | ·   |
| 11 | ·   | ·   | ·   | ·   | ·   | ·   | ·   | ·   | ·   | ·   | ·   | ·   | ·   |
| 12 | ·   | ·   | ·   | ·   | ·   | ·   | ·   | ·   | ·   | ·   | ·   | ·   | ·   |
| 13 | ·   | ·   | ·   | ·   | ·   | ·   | ·   | ·   | ·   | ·   | ·   | ·   | ·   |
| 14 | ·   | ·   | ·   | ·   | ·   | ·   | ·   | ·   | ·   | ·   | ·   | ·   | ·   |
| 15 | ·   | ·   | ·   | ·   | ·   | ·   | ·   | ·   | ·   | ·   | ·   | ·   | ·   |
| 16 | ·   | ·   | ·   | ·   | ·   | ·   | ·   | ·   | ·   | ·   | ·   | ·   | ·   |

*Helix6*
